# Supplementary material for: Recurrence of glioblastoma after radio-chemotherapy is associated with an angiogenic switch to the CXCL12-CXCR4 pathway
Source: PubMed Central journal article supplement (PMC4484484; doi:10.18632/oncotarget.3256), 2015-03-25
Supplement: oncotarget-06-11664-s001.pdf [file oncotarget-06-11664-s001.pdf]

SUPPLEMENTARY FIGURE AND TABLES

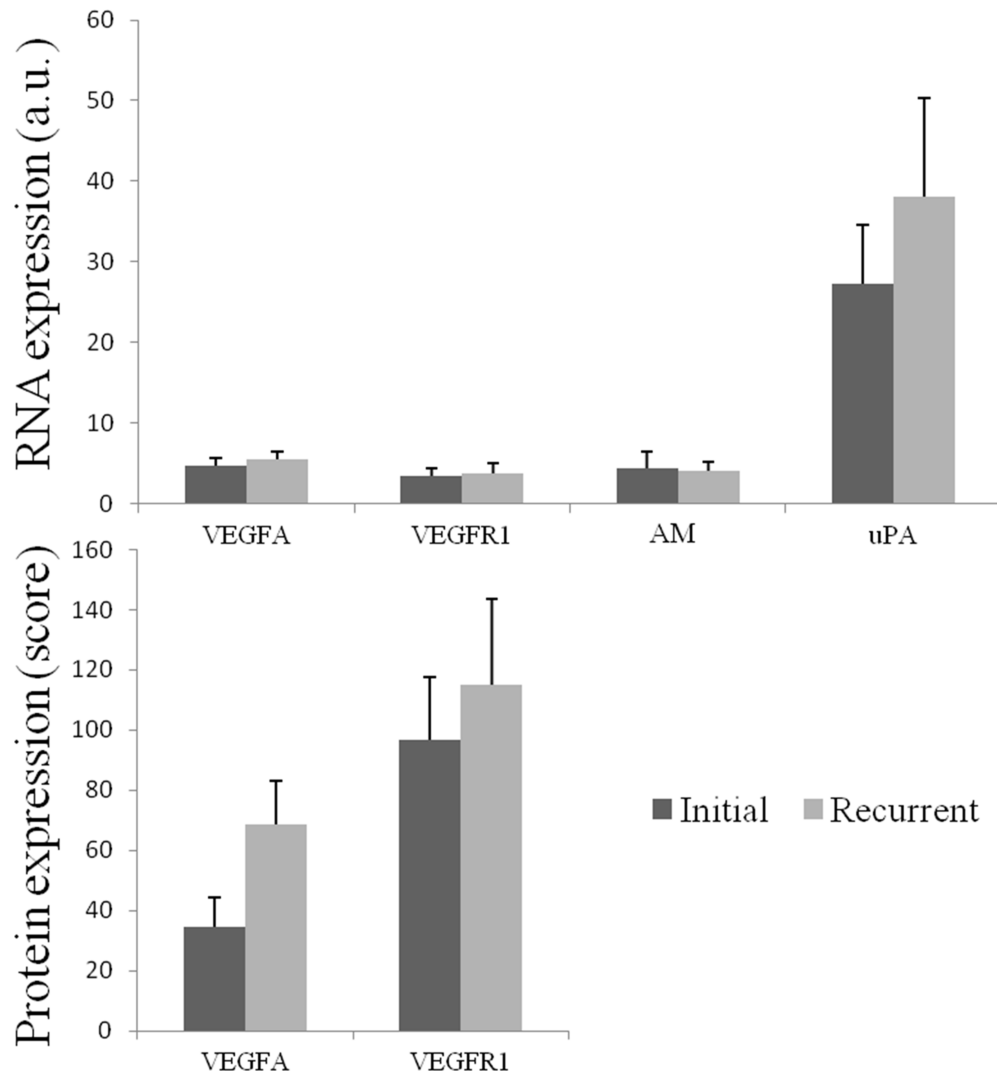

Supplementary Figure 1: Mean RNA expression, with standard error of mean, of *VEGFA*, *VEGFR1*, *AM* and *uPA* in initial (dark grey) and recurrent tumors (light grey). a.u.: arbitrary unit: quantitative ratio of tumor expression/control tissue (normal brain) expression. Protein expression of *VEGFA* and *VEGFR1* in initial and recurrent paired tumors.

**Supplementary Table 1: Primer sequences and conditions**

| Gene Name                        | Sequences                                                                      | Conditions          |
|----------------------------------|--------------------------------------------------------------------------------|---------------------|
| <i>VEGFA</i>                     | S : 5'-AGGAGGAGGGCAGAATCATCA-3'<br>AS : 5'-AGGGTCTCGATTGGATGGC-3'              | 95°C 15s ; 66°C 30s |
| <i>VEGFR1</i>                    | S : 5'-GAACCCCGATTATGTGAGAAA-3'<br>AS : 5'-GATAGATTTCGGGAGCCATCC-3'            | 95°C 15s ; 65°C 30s |
| <i>VEGFR2</i>                    | S : 5'-AACATTTGGGAAATCTCTTGC-3'<br>AS : 5'-GGAAGAACAATGTAGTCTTT-3'             | 95°C 15s ; 65°C 30s |
| <i>AM</i>                        | S : 5'-TGCCCAGACCCTTATTCGG-3'<br>AS : 5'-AGTTGTTTCATGCTCTGGCGG-3'              | 95°C 15s ; 67°C 30s |
| <i>CXCL12</i>                    | S : 5'-CGATTCTTCGAAAGCCATGT-3'<br>AS : 5'-TTGTCTGTTGTTGTTCTTCAGC-3'            | 95°C 15s ; 65°C 30s |
| <i>CXCR4</i>                     | S : 5'-AGGATATAATGAAGTCACTATGGGAAA-3'<br>AS : 5'-AAGGGCACAAAGAGAATTAATGTAGA-3' | 95°C 15s ; 62°C 30s |
| <i>HIF1 <math>\alpha</math></i>  | S : 5'-AAGGAACCTGATGCTTTAACTTTG-3'<br>AS : 5'-TGGTCATCAGTTTCTGTGTGTCG-3'       | 95°C 15s ; 65°C 30s |
| <i>UPA</i>                       | S : 5'-CTTAACTCCAACACGCAAGGGG-3'<br>AS : 5'-AGCTTGTGCCAAACTGGGGATC-3'          | 95°C 15s ; 65°C 30s |
| <i>GAPDH</i>                     | S : 5'-CAAATTCATGGCACCGTC-3'<br>AS : 5'-CCCCTTGATTTTGGAGGGA-3'                 | 95°C 15s ; 65°C 30s |
| <i><math>\beta</math>-ACTINE</i> | S : 5'-CCACACTGTGCCCATCTACG-3'<br>AS : 5'-AGGATCTTCATGAGGTAGTCAGTCAG-3'        | 95°C 15s ; 65°C 30s |
| <i>18S</i>                       | S : 5'-CTACCACATCCAAGGAAGGCA-3'<br>AS : 5'-TTTTTCGTCACTACCTCCCCG-3'            | 95°C 15s ; 67°C 30s |

**Supplementary Table 2: Mean RNA expressions and standard error of the mean at initial diagnosis and recurrence**

|               | Initial diagnosis |           | Recidive |           |
|---------------|-------------------|-----------|----------|-----------|
|               | Mean              | Std Error | Mean     | Std Error |
| VEGFR2        | 2154              | 354       | 1547     | 288       |
| HIF1 $\alpha$ | 208               | 25        | 154      | 17        |
| CXCL12        | 179               | 33        | 469      | 185       |
| CXCR4         | 480               | 112       | 726      | 168       |
| VEGFA         | 467               | 103       | 557      | 93        |
| VEGFR1        | 348               | 91        | 378      | 125       |
| ADM           | 449               | 195       | 414      | 109       |
| uPA           | 2735              | 724       | 3803     | 1235      |

**Supplementary Table 3: Continuous correlation between RNA expression and median iniOS. Cut-off determined by receiver operating characteristic analysis**

| Factor        | Initial Median OS ( <i>p value</i> ) | Cut-off |
|---------------|--------------------------------------|---------|
| CXCR4         | 0,130                                |         |
| CXCL12        | 0,098                                | 70,6    |
| uPA           | 0,058                                | 250,7   |
| HIF1 $\alpha$ | 0,156                                |         |
| VEGFA         | 0,354                                |         |
| VEGFR2        | 0,009                                | 792,6   |
| VEGFR1        | 0,093                                | 169,2   |
| AM            | 0,252                                |         |

**Supplementary Table 4: Potential predictive value of RNA expression levels for bevacizumab activity at recurrence**

| Markers for bevacizumab activity prediction | Recurrent PFS | Recurrent OS |
|---------------------------------------------|---------------|--------------|
| <b>Initial VEGFA</b>                        |               |              |
| High                                        | 0,783         | 0,413        |
| Low                                         | 0,674         | 0,251        |
| <b>Recurrent VEGFA</b>                      |               |              |
| High                                        | 0,234         | 0,215        |
| Low                                         | 0,442         | 0,442        |
| <b>Initial VEGFR2</b>                       |               |              |
| High                                        | 0,934         | 0,941        |
| Low                                         | 0,382         | 0,240        |
| <b>Recurrent VEGFR2</b>                     |               |              |
| High                                        | 0,358         | 0,041        |
| Low                                         | 0,150         | 0,046        |
